# Supplementary material
Source: PubMed Central journal article supplement (PMC4536116)
Supplement: NIHMS705270-supplement-2.pdf [file NIHMS705270-supplement-2.pdf]

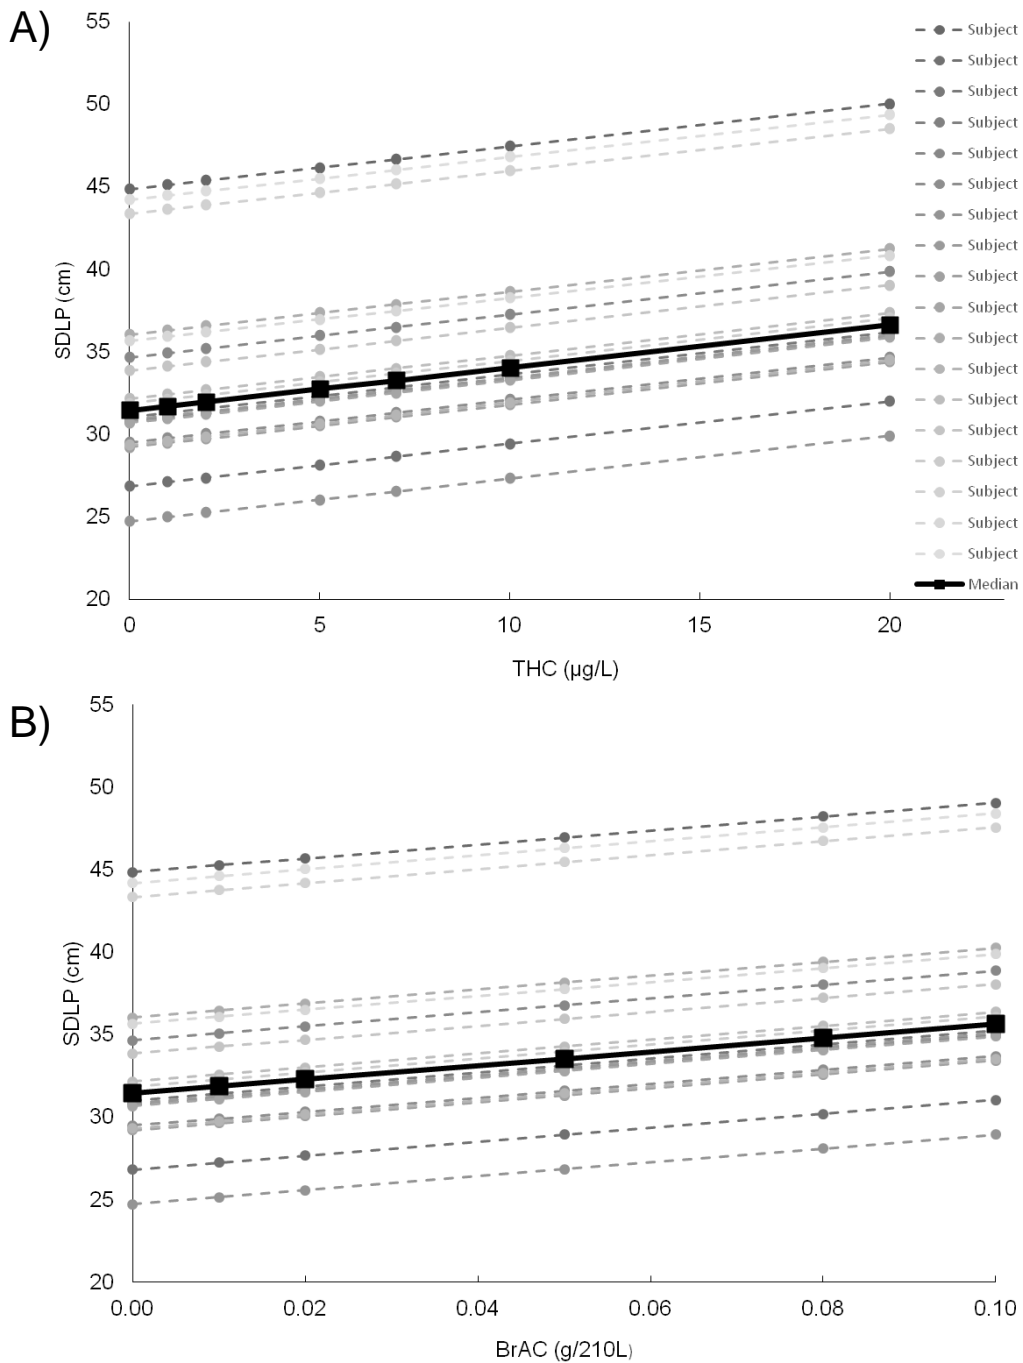

Supplemental Figure 1. Median and individual subject model-predicted standard deviation of lateral position (SDLP) for various blood  $\Delta^9$ -tetrahydrocannabinol (THC) concentrations (A) and breath alcohol concentrations (BrAC) (B). Data generated from 18 healthy occasional cannabis smokers 0.5-1.3h after ingesting placebo or active oral alcohol and inhaling placebo or active vaporized bulk cannabis. Values obtained by assessing GLM Select results at specific THC concentrations and BrAC, speed limit 55 miles/h (89 km/h), straight road.
