# Supplementary material
Source: PubMed Central journal article supplement (PMC4536116)
Supplement: NIHMS705270-supplement-3.pdf [file NIHMS705270-supplement-3.pdf]

Supplemental Table 1. General Linear Model (GLM) Select results of natural log (ln)-transformed standard deviation of lateral position (SDLP) in 18 volunteer drivers after controlled vaporized cannabis with or without oral alcohol.

| ln(SDLP)                     |       |                    |      |                   |         |
|------------------------------|-------|--------------------|------|-------------------|---------|
| Parameter                    | DF    | ln Estimate<br>(b) | t    | Standard<br>Error | p-value |
| <b>THC</b>                   | 1     | 0.008              | 3.79 | 0.002             | 0.0002  |
| <b>BrAC</b>                  | 1     | 0.014              | 3.30 | 0.004             | 0.0010  |
| THC*BrAC                     |       |                    |      |                   |         |
| <b>Speed Limit</b>           | 1     | 0.013              | 17   | 0.001             | <0.0001 |
| <b>Inverse<br/>Curvature</b> | 1     | 15                 | 10   | 1.4               | <0.0001 |
| <b>Intercept</b>             | 1     | 3.0                | 48   | 0.062             | <0.0001 |
| <b>Subject</b>               | 17    |                    |      |                   |         |
| <i>Model df:</i>             | 21    |                    |      |                   |         |
| <i>Model F-value</i>         | 26.02 |                    |      |                   |         |
| <i>Error df:</i>             | 1916  |                    |      |                   |         |

Driving occurred 0.5h after drinking placebo or active alcohol (calculated to produce approximate peak 0.065% BrAC) and inhaling placebo, 2.9% THC, or 6.7% THC vaporized bulk cannabis (500 mg, Volcano<sup>®</sup> Medic vaporizer). Estimate represents parameter (coefficient) estimate for each factor (negative b indicates the parameter decreases the effect; positive b indicates the parameter increases the overall effect). The t-values estimate effect size. **Boldface** indicates parameter included in the final GLM Select model of ln(SDLP).

Abbreviations: DF, degrees of freedom; THC, blood  $\Delta^9$ -tetrahydrocannabinol concentration; BrAC, breath alcohol concentration

Supplemental Table 2. Standard deviation of lateral position (SDLP) associated with specific blood  $\Delta^9$ -tetrahydrocannabinol (THC) concentrations and breath alcohol concentrations (BrAC) during driving based on transformed ln(SDLP) GLM Select model.

| During-Drive Concentration |                  | Standard Deviation of Lateral Position (SDLP) |                                 |                                      |
|----------------------------|------------------|-----------------------------------------------|---------------------------------|--------------------------------------|
| THC<br>( $\mu\text{g/L}$ ) | BrAC<br>(g/210L) | Median [range]<br>Predicted SDLP<br>(cm)      | Difference <sup>a</sup><br>(cm) | Percent<br>Increase <sup>a</sup> (%) |
| <b>0</b>                   | 0                | 26.5 [20.6-40.5]                              | --                              | --                                   |
| <b>1</b>                   | 0                | 26.8 [20.8-40.8]                              | 0.2                             | 0.8                                  |
| <b>2</b>                   | 0                | 27.0 [21.0-41.2]                              | 0.4                             | 1.6                                  |
| <b>5</b>                   | 0                | 27.6 [21.5-42.2]                              | 1.1                             | 4.2                                  |
| <b>7</b>                   | 0                | 28.1 [21.8-42.9]                              | 1.6                             | 5.9                                  |
| <b>10</b>                  | 0                | 28.8 [22.4-43.9]                              | 2.3                             | 8.5                                  |
| <b>20</b>                  | 0                | 31.2 [24.3-47.7]                              | 4.7                             | 18                                   |
| 0                          | <b>0.01</b>      | 26.9 [20.9-41.1]                              | 0.4                             | 1.4                                  |
| 0                          | <b>0.02</b>      | 27.3 [21.2-41.7]                              | 0.8                             | 2.9                                  |
| 0                          | <b>0.05</b>      | 28.5 [22.1-43.5]                              | 2.0                             | 7.4                                  |
| 0                          | <b>0.08</b>      | 29.7 [23.1-45.4]                              | 3.2                             | 12                                   |
| 0                          | <b>0.10</b>      | 30.6 [23.8-46.7]                              | 4.1                             | 15                                   |
| <b>2</b>                   | <b>0.05</b>      | 29.0 [22.5-44.2]                              | 2.4                             | 9.1                                  |
| <b>5</b>                   | <b>0.05</b>      | 29.7 [23.1-45.3]                              | 3.1                             | 12                                   |

Data generated from 18 healthy occasional cannabis smokers 0.5-1.3h after ingesting placebo or active oral alcohol and inhaling placebo or active vaporized bulk cannabis. Values obtained by assessing GLM Select results at specific THC concentrations and BrAC, speed limit 55 miles/h (89 km/h), straight road.

<sup>a</sup>Relative to median.
